# Supplementary material for: Unraveling Shikimate Dehydrogenase Inhibition by 6-Nitroquinazoline-2,4-diol and its Impact on Soybean and Maize Growth
Source: Preprints.org preprint supplement (doi:10.20944/preprints202403.1066.v1), 2024-03-19
Supplement: Supplementary file 1 [file supplementary]

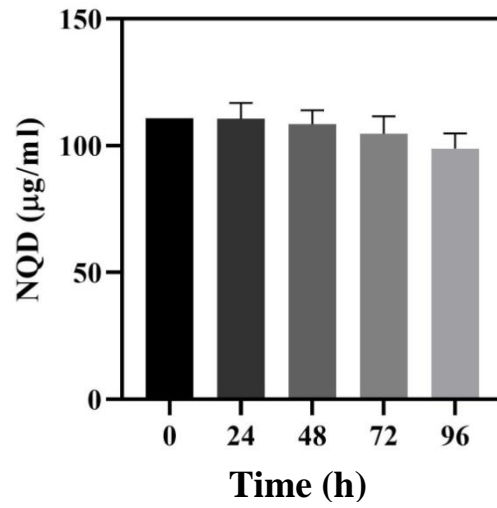

**Figure S1.** In a system without seedlings, the spontaneous degradation of NQD was observed during 96 h of incubation. The results are presented as the mean values  $\pm$  SEM (n = 5) and were analyzed by Dunnett's multiple comparison test ( $p \leq 0.05$ ).

**Table S1.** Yield of NQD extraction in soybean and maize roots incubated for 96 h. Mean values (n = 3).

| <b>Sample</b>   | <b>Area (mAU)</b> | <b>Performance (%)</b> |
|-----------------|-------------------|------------------------|
| 125 $\mu$ M NQD | 1853996           |                        |
| Soybean         | 1624525           | 87%                    |
| Maize           | 1442945           | 77%                    |

**Table S2.** Identification of proteins by mass spectrometry.

| <b>UniProt code</b> | <b>Description</b>                                                                                            | <b>Molecular mass<br/>(Da)</b> | <b>Score</b> | <b>Coverage<br/>(%)</b> |
|---------------------|---------------------------------------------------------------------------------------------------------------|--------------------------------|--------------|-------------------------|
| Q9SQT8              | Bifunctional 3-<br>dehydroquinate<br>desidratase/shikimate<br>dehydrogenase from <i>A.</i><br><i>thaliana</i> | 66138                          | 13717        | 75.79                   |
| A0A119LPF9          | Transmembrane protein<br><i>A. thaliana</i>                                                                   | 12109                          | 5708         | 43.65                   |

**Table S3.** Biometric parameters of soybean seedlings incubated for 48 h without (control) or with 100  $\mu\text{M}$  glyphosate and 100  $\mu\text{M}$  glyphosate plus 500  $\mu\text{M}$  NQD.

| <b>Soybean</b>   | <b>Length</b>                   | <b>Fresh biomass</b>            |
|------------------|---------------------------------|---------------------------------|
| Control          | 4.943 $\pm$ 0.4296 <sup>a</sup> | 1.110 $\pm$ 0.0479 <sup>a</sup> |
| Glyphosate       | 2.620 $\pm$ 0.3612 <sup>b</sup> | 0.829 $\pm$ 0.0551 <sup>b</sup> |
| Glyphosate + NQD | 2.097 $\pm$ 0.1260 <sup>b</sup> | 0.814 $\pm$ 0.0474 <sup>b</sup> |

Mean values  $\pm$  SEM (n = 3) followed by different letters are significantly different, as determined by Tukey's multiple comparisons test (*p*)
